# Supplementary material
Source: Springer Nature journal article supplement (https://www.springermedizin.de/resource/supplementary/12883_2010_553_MOESM4_ESM.pdf/9455356)

# Mean FVNS score change during each condition

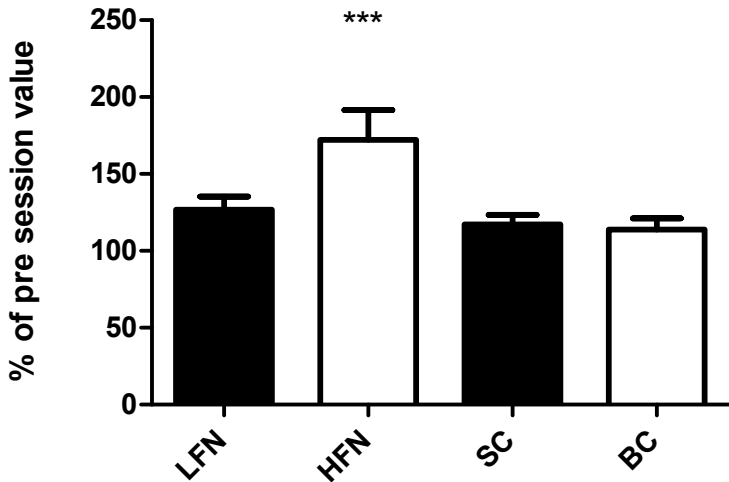

Supplement: MOESM4 [file 9455356]
